# Supplementary material for: NOTCH1 signaling regulates the latent neurogenic program in adult reactive astrocytes after spinal cord injury
Source: PubMed Central journal article supplement (PMC9254256; doi:10.7150/thno.71378), 2022-05-27
Supplement: thnov12p4548s1.pdf [file thnov12p4548s1.pdf]

## **Supplementary information**

### **NOTCH1 signaling regulates the latent neurogenic program in adult reactive astrocytes after spinal cord injury**

Zijian Tan, Shangyao Qin, Yimin Yuan, Xin Hu, Xiao Huang, Hong Liu, Yingyan Pu, Cheng He, Zhida Su

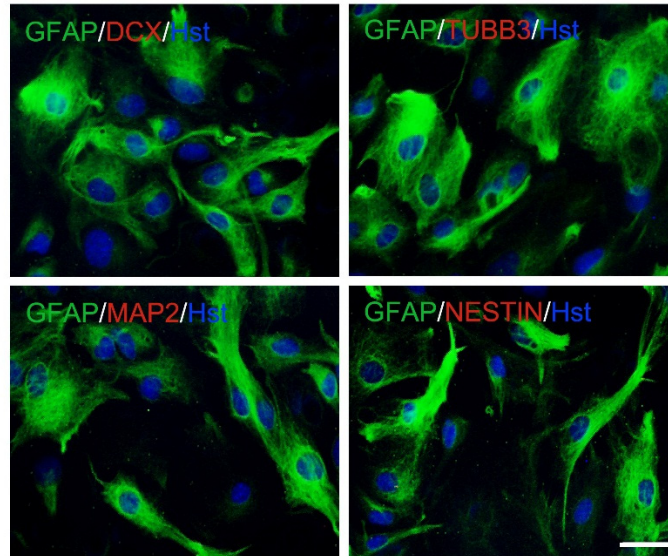

**Supplementary Figure S1. Characterization of cultured astrocytes.** Cultured astrocytes were immunostained with antibodies against GFAP, DCX, TUBB3, MAP2 and NESTIN. The scale bar represents 25  $\mu$ m.

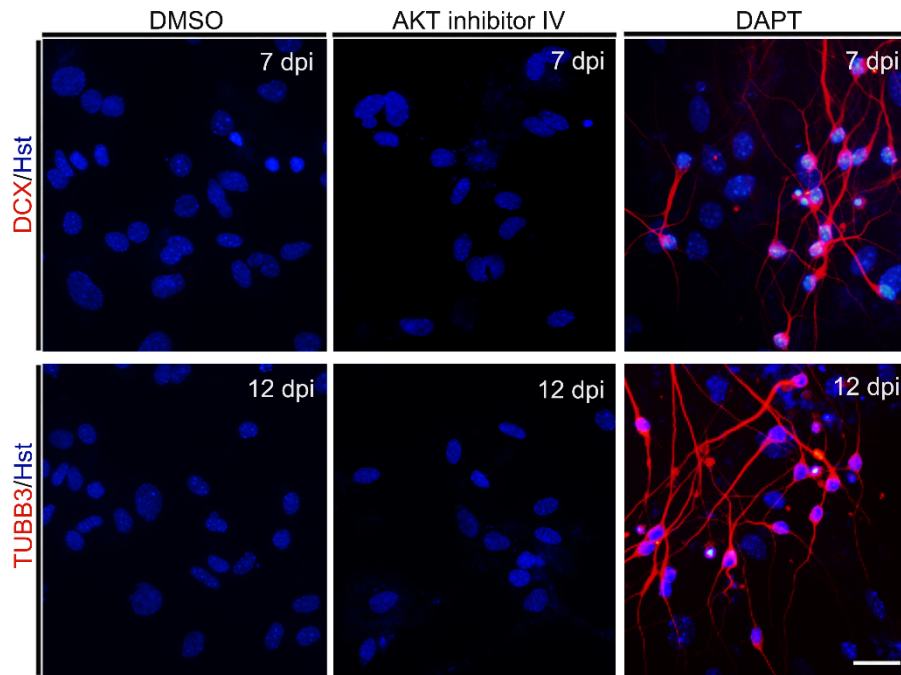

**Supplementary Figure S2. Inhibition of AKT signaling fails to reprogram astrocytes into neurons *in vitro*.** DCX and TUBB3 immunostaining showed that inhibition of NOTCH1 signaling with DAPT successfully induced astrocyte-to-neuron conversion, whereas inhibition of AKT signaling with AKT inhibitor IV failed to convert cultured astrocytes into neurons. The scale bar represents 25  $\mu\text{m}$ .

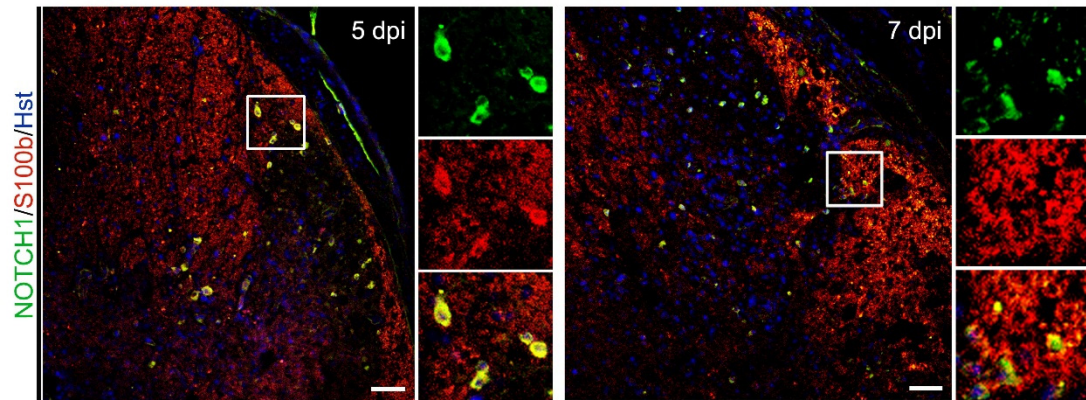

**Supplementary Figure S3. Expression of Notch1 in spinal astrocytes after SCI.** Immunohistochemical analysis was performed by staining with antibodies against NOTCH1 and S100. The scale bars represent 50  $\mu\text{m}$

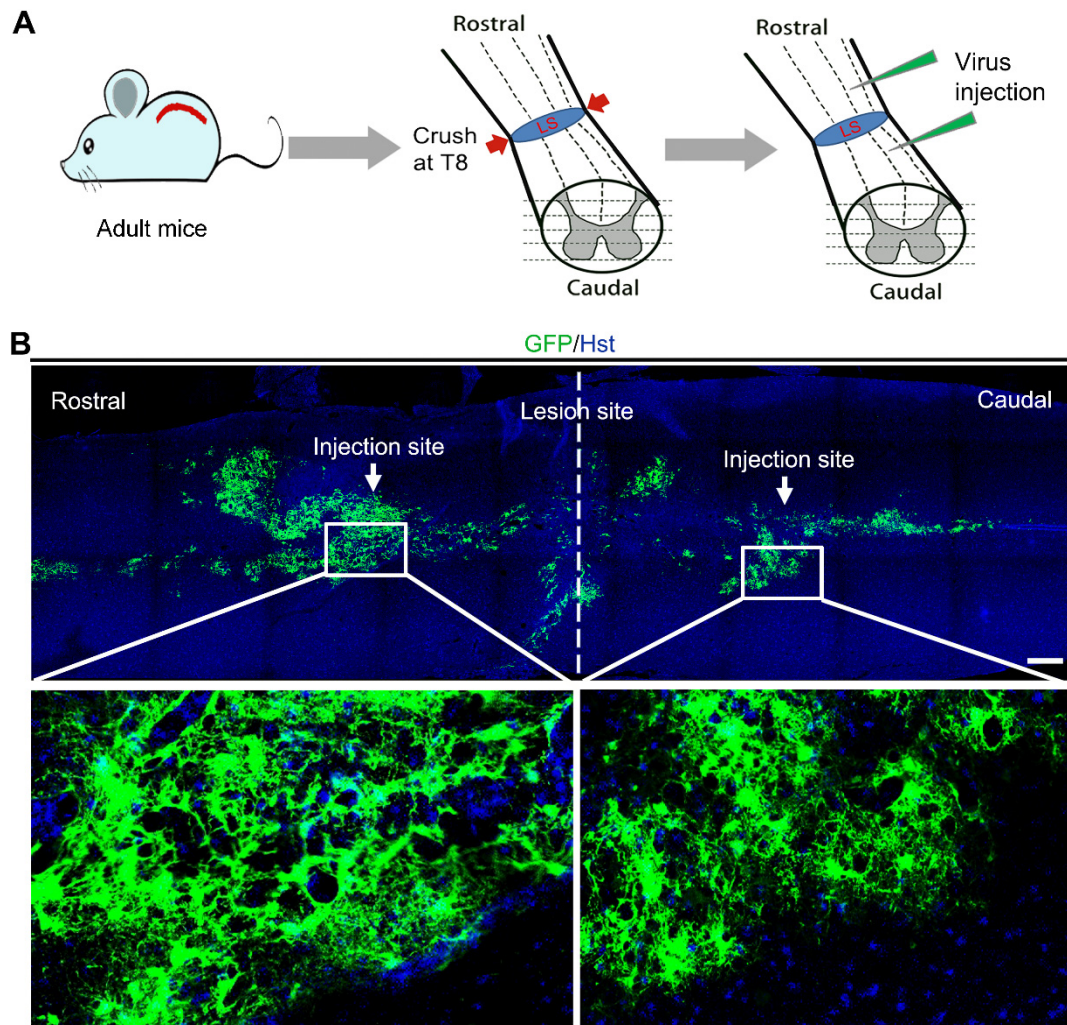

**Supplementary Figure S4. SCI model and virus injection. (A)** The spinal cord of adult mouse was crushed at T8 level. Lentivirus was manually injected into the spinal cord parenchyma at each of the two locations 1.5 mm apart the lesion site (LS). **(B)** A lower magnification view of a longitudinal section from the adult spinal cord injected with lentivirus at 1 wpi. Arrows show the injection sites. The scale bar represents 100  $\mu\text{m}$ .

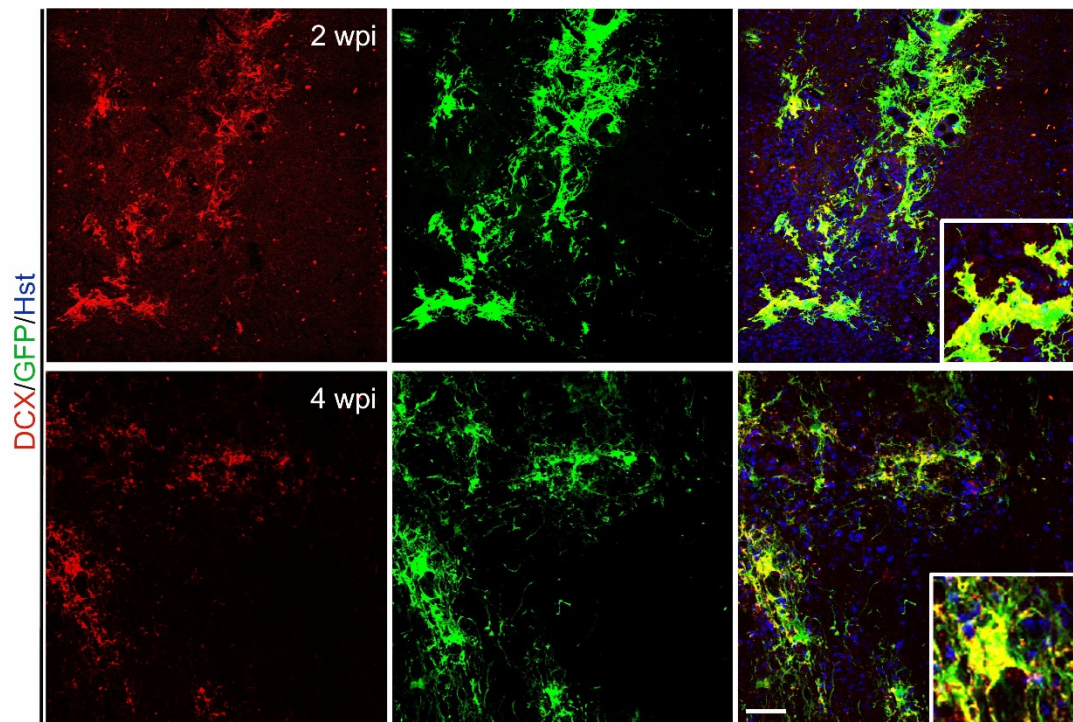

**Supplementary Figure S5. Notch1 knockdown in spinal astrocytes triggers neuroblast production in the injured spinal cord.** Notch1 in astrocytes was knocked down by hGFAP promoter-driven shRNA. Immunohistochemical analysis was performed by immunostaining with DCX and GFP at 2 and 4 wpi. The scale bar represents 50  $\mu$ m.

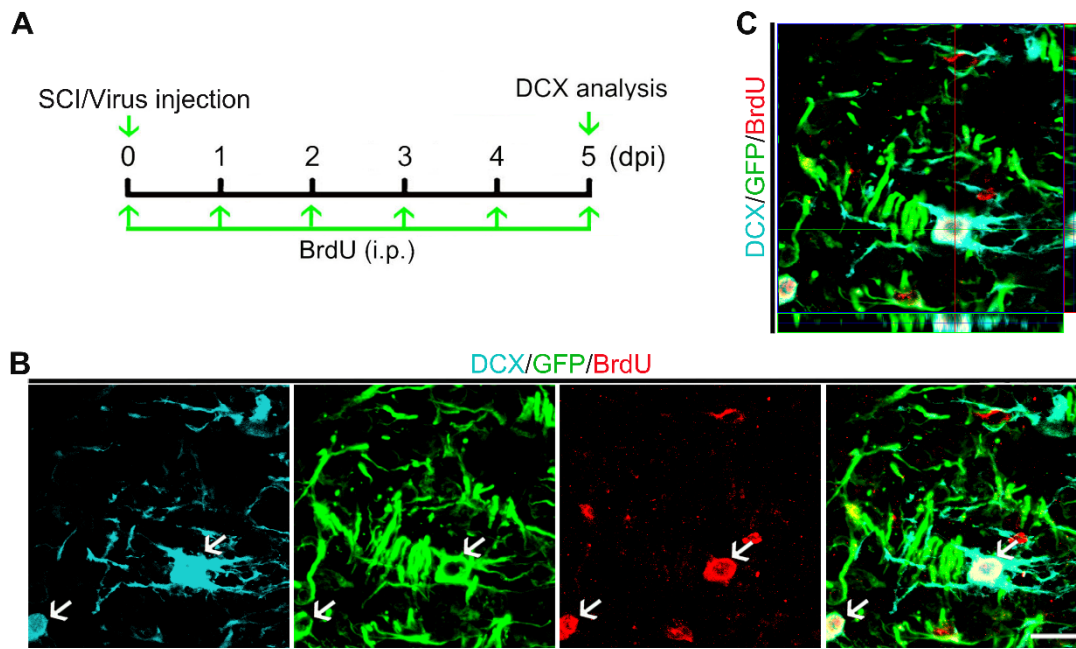

**Supplementary Figure S6. BrdU tracing of induced DCX-positive cells.** (A) Schematic diagrams of study design for (B) and (C). Lentivirus expressing hGFAP-Notch1 shRNA was injected into crush-injured spinal cord. (B and C) Incorporation of BrdU in induced DCX-positive cells. Arrows indicate the BrdU<sup>+</sup>/DCX<sup>+</sup>/GFP<sup>+</sup> cells. An orthogonal view of BrdU<sup>+</sup>/DCX<sup>+</sup>/GFP<sup>+</sup> cells is shown in (C). The scale bar represents 25  $\mu$ m.

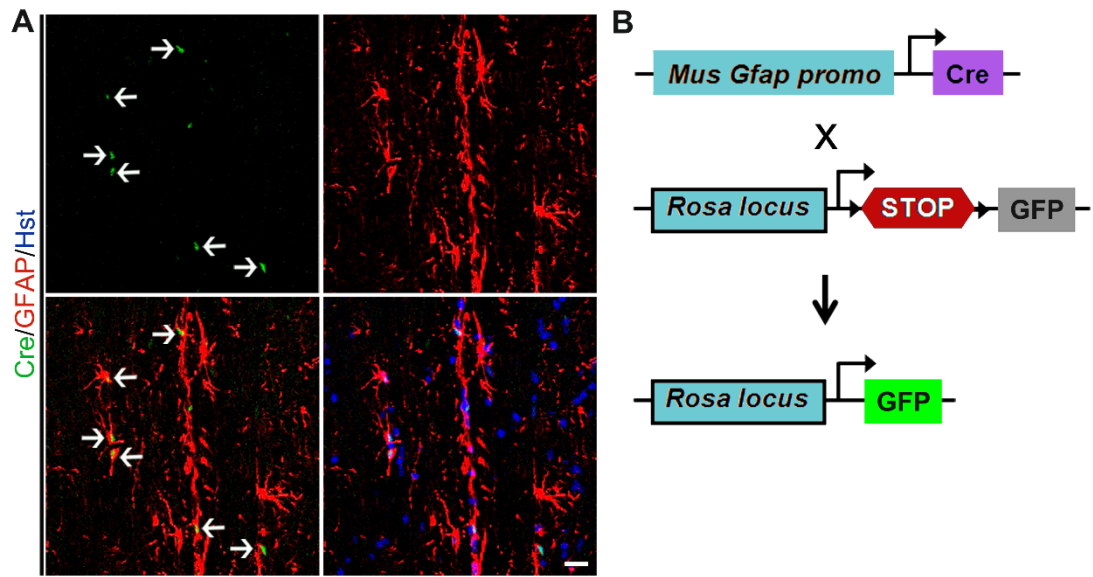

**Supplementary Figure S7. Generation of mGfap::Cre; Rosa::GFP transgenic mice.** (A) Immunostaining with Cre and GFAP showed that astrocytes were specifically targeted in mGfap::Cre line mice. (B) Schematic diagram of experimental procedures for the generation of mGfap::Cre; Rosa::GFP transgenic mice. The scale bar represents 25  $\mu\text{m}$ .



**Supplementary Table S1. Primary antibodies used for western blot**

| <b>Antibody</b>                                  | <b>Host</b> | <b>Dilution</b> | <b>Source</b>             | <b>Catalog number</b> |
|--------------------------------------------------|-------------|-----------------|---------------------------|-----------------------|
| NOTCH1                                           | Rabbit      | 1:1000          | Cell Signaling Technology | #4147                 |
| p-mTOR (Phospho-mTOR)                            | Rabbit      | 1:1000          | Cell Signaling Technology | #2971                 |
| p-STAT3 (Phospho-STAT3)                          | Rabbit      | 1:1000          | Cell Signaling Technology | #9145                 |
| p-AKT (Phospho-AKT)                              | Rabbit      | 1:1000          | Cell Signaling Technology | #9271                 |
| AKT                                              | Rabbit      | 1:1000          | Cell Signaling Technology | #9272                 |
| p-P38 (Phospho-p38 MAPK)                         | Rabbit      | 1:1000          | Cell Signaling Technology | #9211                 |
| P38 (p38 MAPK)                                   | Rabbit      | 1:1000          | Cell Signaling Technology | #9212                 |
| GAPDH (Glyceraldehyde-3-phosphate dehydrogenase) | Rabbit      | 1:5000          | Proteintech               | 10494-1-AP            |
| $\beta$ -ACTIN                                   | Mouse       | 1:5000          | Proteintech               | 66009-1-Ig            |

**Supplementary Table S2: Primers used for qRT-PCR**

| <b>Gene</b> | <b>Primer sequence (5'-3')</b>    |
|-------------|-----------------------------------|
| Notch1      | sense: GATGGCCTCAATGGGTACAAG      |
|             | antisense: TCGTTGTTGTTGATGTCACAGT |
| Hes1        | sense: TCAACACGACACCGGACAAAC      |
|             | antisense: ATGCCGGGAGCTATCTTTCTT  |
| Hey1        | sense: GCGCGGACGAGAATGGAAA        |
|             | antisense: TCAGGTGATCCACAGTCATCTG |
| NeuroD1     | sense: ACGCAGAAGGCAAGGTGTCC       |
|             | antisense: GTTCCTCGTCCTGAGAACTG   |
| NeruoD2     | sense: AAGCCAGTGTCTCTTCGTGG       |
|             | antisense: GCCTTGGTCATCTTGCGTTT   |
| Pax6        | sense: TAGCCCAGTATAAACGGGAGTG     |
|             | antisense: CCAGGTTGCGAAGAACTCTG   |
| Lmx1a       | sense: ACGGCCTGAAGATGGAGGA        |
|             | antisense: CAGAAACCTGTCCGAGATGAC  |
| Lhx6        | sense: CGGCAAGAATATCTGCTCCAG      |
|             | antisense: CAAATCGGCTGAAGTAGTCCAT |

**Supplementary Table S3. Primary antibodies used for immunostaining**

| <b>Antibody</b>                             | <b>Host</b> | <b>Dilution</b> | <b>Source</b>             | <b>Catalog number</b> |
|---------------------------------------------|-------------|-----------------|---------------------------|-----------------------|
| ALDOC (Aldolase C)                          | Goat        | 1:100           | Santa Cruz                | sc-12065              |
| BrdU (5-bromodeoxyuridine)                  | Rat         | 1:100           | Abcam                     | Ab6326                |
| ChAT (Choline acetyltransferase)            | Goat        | 1:100           | Millipore                 | #AB144P               |
| DCX (Doublecortin)                          | Rabbit      | 1:400           | Cell Signaling Technology | #4604                 |
| DCX (Doublecortin)                          | Mouse       | 1:100           | Thermo                    | MA5-17066             |
| GABA (Gamma aminobutyric acid)              | Rabbit      | 1:200           | Sigma                     | A2052                 |
| GAD6 (Glutamic acid decarboxylase 65/67)    | Rabbit      | 1:200           | Abcam                     | Ab183999              |
| GFAP (Glial fibrillary acidic protein)      | Mouse       | 1:200           | Sigma                     | G3893                 |
| GFAP (Glial fibrillary acidic protein)      | Goat        | 1:100           | Abcam                     | Ab53554               |
| GFP (Green fluorescent protein)             | Chicken     | 1:600           | Aves Labs                 | 1020                  |
| MAP2 (Microtubule-associated protein-2)     | Rabbit      | 1:200           | Abcam                     | Ab32454               |
| NESTIN                                      | Rat         | 1:100           | Santa Cruz                | sc-33677              |
| NeuN (Neuron-specific nuclear protein)      | Mouse       | 1:100           | Millipore                 | MAB377                |
| NOTCH1                                      | Rabbit      | 1:100           | Abcam                     | Ab65297               |
| S100b (S100 calcium binding protein B)      | Mouse       | 1:100           | Boster                    | BM0120                |
| SYN-1 (Synapsin-1)                          | Rabbit      | 1:200           | Cell Signaling Technology | #5297                 |
| TUBB3 (Tubulin beta-3)                      | Rabbit      | 1:200           | Abcam                     | Ab18207               |
| TUBB3 (Tubulin beta-3)                      | Mouse       | 1:200           | BioLegend                 | 801202                |
| VGLUT-1 (Vesicular glutamate transporter 1) | Rabbit      | 1:200           | Synaptic Systems          | 135302                |
